# Supplementary material for: Effect of Antimicrobial Contact Lenses on Corneal Infiltrative Events: A Randomized Clinical Trial
Source: PubMed Central journal article supplement — Transl Vis Sci Technol. 2021 Jun 30;10(7):32. doi: 10.1167/tvst.10.7.32 (PMC8254012; doi:10.1167/tvst.10.7.32), 2021-06-30
Supplement: tvst-10-7-32_s001.pdf [file tvst-10-7-32_s001.pdf]

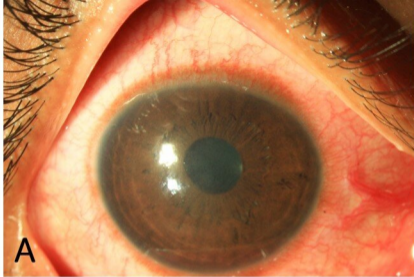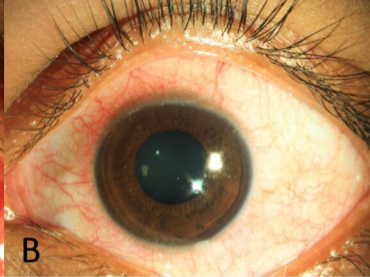

Supplementary Figure 1: (A) The eye of a participant wearing a Mel4-coated contact lens who developed a contact lens acute red eye. (B) The eye of a participant wearing an uncoated control lens who developed a contact lens acute red eye.
