# Supplementary material for: Effect of Antimicrobial Contact Lenses on Corneal Infiltrative Events: A Randomized Clinical Trial
Source: PubMed Central journal article supplement — Transl Vis Sci Technol. 2021 Jun 30;10(7):32. doi: 10.1167/tvst.10.7.32 (PMC8254012; doi:10.1167/tvst.10.7.32), 2021-06-30
Supplement: tvst-10-7-32_s002.pdf [file tvst-10-7-32_s002.pdf]

Supplementary Table 1: Demographic and biometric data of subjects dispensed with study lenses.

|                                                           | Test eye                           | Control eye                        | p-value |
|-----------------------------------------------------------|------------------------------------|------------------------------------|---------|
| Age (years) : Mean $\pm$ SD<br>Range                      | 22.6 $\pm$ 4.2<br>18 to 42         |                                    | -       |
| Gender (Male : Female)                                    | 93 : 83                            |                                    | -       |
| Refractive error - Sphere (Ds) : Mean $\pm$ SD<br>Range   | -2.82 $\pm$ 1.44<br>-0.50 to -6.50 | -2.80 $\pm$ 1.46<br>-0.50 to -6.50 | 0.528   |
| Refractive error - Cylinder (Dc) : Mean $\pm$ SD<br>Range | -0.25 $\pm$ 0.35<br>-0.25 to -1.50 | -0.22 $\pm$ 0.35<br>-0.25 to -1.50 | 0.249   |
| Keratometry - Flat (D) : Mean $\pm$ SD<br>Range           | 43.02 $\pm$ 1.44<br>37.50 to 47.25 | 43.01 $\pm$ 1.46<br>37.50 to 47.25 | 0.663   |
| Keratometry - Steep (D) : Mean $\pm$ SD<br>Range          | 43.76 $\pm$ 1.58<br>38.75 to 48.50 | 43.71 $\pm$ 1.58<br>38.75 to 48.50 | 0.105   |
| Contact lens wear experience<br>(Neophyte : Experienced)  | 128 : 48                           |                                    | -       |
| Contact lens base curve (8.3 : 8.7) mm                    | 106 : 70                           |                                    | -       |
| Contact Lens Power (Ds) : Mean $\pm$ SD<br>Range          | -2.84 $\pm$ 1.36<br>-1.00 to -6.00 | -2.84 $\pm$ 1.39<br>-1.00 to -6.00 | 0.869   |
